# Supplementary material for: TPNA10168, an Nrf-2 activator, stimulates glutathione production by inducing system Xc-, and g-glutamate cysteine ligase subunits in cultured mouse astrocytes.
Source: Research Square preprint supplement (doi:10.21203/rs.3.rs-1567238/v1), 2022-04-20
Supplement: Supplementary file 1 [file 2f26c303e1b2bbc9d6e42816.xlsx]

## Sheet: Fig.3a systemXc 
G3PDH						SystemXc
30 mM TPNA treatment (hours)	mRNA copy numbers (copies/mg totalRNA)					30 mM TPNA treatment (hours)	mRNA copy numbers (copies/mg totalRNA)
	cDNA sample						cDNA sample
	060820RT ＃1-12	022521RT ＃1-12	022521RT ＃13-24				060820RT ＃1-12	022521RT ＃1-12	022521RT ＃13-24
0	9.30086e+10	5.94575e+10	6.81497e+10			0	2.77073e+10	6.82442e+09	1.98877e+10
	9.90093e+10	7.03514e+10	6.61394e+10				5.29591e+10	1.5895e+10	1.41701e+10
1	8.33976e+10	6.92922e+10	7.08244e+10			1	2.77211e+10	1.25956e+10	7.87223e+09
	1.28203e+11	5.74795e+10	5.9932e+10				6.34007e+10	9.43866e+09	1.01205e+10
2	1.20139e+11	5.07567e+10	6.40524e+10			2	8.44243e+10	1.32246e+10	1.82384e+10
	1.1021e+11	7.38102e+10	6.8911e+10				6.65207e+10	2.04857e+10	2.00103e+10
3	9.16077e+10	6.40523e+10	6.77895e+10			3	6.51477e+10	3.25537e+10	3.80883e+10
	1.23631e+11	6.45055e+10	7.19354e+10				1.29097e+11	3.48074e+10	2.75648e+10
6	9.63521e+10	7.24579e+10	6.51456e+10			6	1.6731e+11	8.0629e+10	5.02644e+10
	1.19566e+11	6.41506e+10	6.81036e+10				1.38349e+11	5.45675e+10	3.64629e+10
12	1.25456e+11	7.04351e+10	6.01671e+10			12	1.59892e+11	7.58929e+10	5.07283e+10
	1.16804e+11	6.54805e+10	6.45024e+10				1.29291e+11	6.46582e+10	5.59899e+10
SystemXc/G3PDH
30 mM TPNA treatment (hours)	Relative expression to G3PDH (SystemXc/G3PDH)
	cDNA sample					30 mM TPNA treatment (hours)	Relative expression to G3PDH (SystemXc/G3PDH)				n
	060820RT ＃1-12	022521RT ＃1-12	022521RT ＃13-24				mean (% of 0 time)	SEM (% of 0 time)	meam	SEM
0	0.297901	0.114778	0.291824			0	100	20.6221	0.279929	0.0577274	6
	0.53489	0.225937	0.214247			1	86.5058	21.0426	0.242155	0.0589045	6
1	0.332397	0.181775	0.111151			2	144.055	28.6355	0.403253	0.0801593	6
	0.494532	0.164209	0.168867			3	223.167	33.6729	0.624711	0.0942604	6
2	0.702723	0.260549	0.284742			6	366.991	60.681	1.02732	0.169864	6
	0.60358	0.277545	0.290379			12	366.608	23.5905	1.02625	0.0660366	6
3	0.71116	0.508235	0.561861
	1.04422	0.539604	0.383189
6	1.73644	1.11277	0.771571
	1.1571	0.850616	0.535403
12	1.27448	1.07749	0.843124
	1.10691	0.987442	0.868029

## Sheet: Fig.3a GCLm
G3PDH						GCLm
30 mM TPNA treatment (hours)	mRNA copy numbers (copies/mg totalRNA)					30 mM TPNA treatment (hours)	mRNA copy numbers (copies/mg totalRNA)
	cDNA sample						cDNA sample
	060820RT ＃1-12	022521RT ＃1-12	022521RT ＃13-24				060820RT ＃1-12	022521RT ＃1-12	022521RT ＃13-24
0	9.30086e+10	5.94575e+10	6.81497e+10			0	1.29567e+11	4.98108e+10	8.51427e+10
	9.90093e+10	7.03514e+10	6.61394e+10				1.97328e+11	8.98972e+10	7.7725e+10
1	8.33976e+10	6.92922e+10	7.08244e+10			1	1.05778e+11	1.86145e+11	1.71663e+11
	1.28203e+11	5.74795e+10	5.9932e+10				2.18982e+11	1.77082e+11	1.36782e+11
2	1.20139e+11	5.07567e+10	6.40524e+10			2	1.89857e+11	1.7775e+11	1.73283e+11
	1.1021e+11	7.38102e+10	6.8911e+10				1.65064e+11	2.21637e+11	1.63974e+11
3	9.16077e+10	6.40523e+10	6.77895e+10			3	2.01924e+11	2.20476e+11	3.4242e+11
	1.23631e+11	6.45055e+10	7.19354e+10				4.04838e+11	3.60107e+11	2.47529e+11
6	9.63521e+10	7.24579e+10	6.51456e+10			6	3.47285e+11	4.06561e+11	3.57036e+11
	1.19566e+11	6.41506e+10	6.81036e+10				3.81752e+11	3.92465e+11	3.16336e+11
12	1.25456e+11	7.04351e+10	6.01671e+10			12	4.98819e+11	2.58922e+11	3.37215e+11
	1.16804e+11	6.54805e+10	6.45024e+10				4.56933e+11	3.63562e+11	2.60663e+11
GCLm/G3PDH
30 mM TPNA treatment (hours)	Relative expression to G3PDH (GCLm/G3PDH)
	cDNA sample					30 mM TPNA treatment (hours)	Relative expression to G3PDH (GCLm/G3PDH)				n
	060820RT ＃1-12	022521RT ＃1-12	022521RT ＃13-24				mean (% of 0 time)	SEM (% of 0 time)	meam	SEM
0	1.39307	0.837754	1.24935			0	100	11.7158	1.32103	0.154769	6
	1.99303	1.27783	1.17517			1	169.686	20.3531	2.24161	0.268871	6
1	1.26836	2.68638	2.42379			2	185.053	24.5115	2.44461	0.323805	6
	1.70809	3.08079	2.28228			3	290.123	38.6391	3.83262	0.510435	6
2	1.58031	3.50201	2.70533			6	361.479	36.2793	4.77526	0.479261	6
	1.49772	3.0028	2.3795			12	337.64	27.0394	4.46034	0.357199	6
3	2.20423	3.44212	5.05122
	3.27457	5.58259	3.441
6	3.60434	5.61099	5.48059
	3.19281	6.11787	4.64493
12	3.97604	3.67603	5.60464
	3.91197	5.55221	4.04114

## Sheet: Fig.3a GCLc
G3PDH						GCLc
30 mM TPNA treatment (hours)	mRNA copy numbers (copies/mg totalRNA)					30 mM TPNA treatment (hours)	mRNA copy numbers (copies/mg totalRNA)
	cDNA sample						cDNA sample
	091720RT #1-12	091720RT #13-24	060820RT ＃1-12				091720RT #1-12	091720RT #13-24	060820RT ＃1-12
0	1.4052e+11	2.303e+11	9.30086e+10			0	6.41494e+09	8.35957e+09	7.61802e+09
	2.06549e+11	1.57287e+11	9.90093e+10				5.87921e+09	9.30489e+09	8.66329e+09
1	2.56279e+11	2.39772e+11	8.33976e+10			1	8.39582e+09	6.36138e+09	6.75017e+09
	2.26566e+11	2.02323e+11	1.28203e+11				5.08822e+09	7.70062e+09	9.27869e+09
2	1.96725e+11	1.28771e+11	1.20139e+11			2	1.02272e+10	6.65936e+09	8.67274e+09
	2.57355e+11	1.26489e+11	1.1021e+11				8.09257e+09	4.2256e+09	8.18562e+09
3	2.32333e+11	7.40913e+10	9.16077e+10			3	1.32472e+10	6.84819e+09	9.84988e+09
	2.27698e+11	1.46358e+11	1.23631e+11				8.84855e+09	1.04669e+10	1.32465e+10
6	2.16843e+11	1.87533e+11	9.63521e+10			6	1.73631e+10	1.80264e+10	1.41885e+10
	2.10432e+11	8.40111e+10					1.94757e+10	1.07929e+10
12	7.04351e+10	6.01671e+10	1.25456e+11			12	8.99258e+09	8.87013e+09	1.37642e+10
	6.54805e+10	6.45024e+10	1.16804e+11				8.7656e+09	9.03062e+09	1.081e+10
GCLc/G3PDH
30 mM TPNA treatment (hours)	Relative expression to G3PDH (GCLc/G3PDH)
	cDNA sample					30 mM TPNA treatment (hours)	Relative expression to G3PDH (GCLc/G3PDH)				n
	091720RT #1-12	091720RT #13-24	060820RT ＃1-12				mean (% of 0 time)	SEM (% of 0 time)	meam	SEM
0	0.0456513	0.0362986	0.0819067			0	100	17.4787	0.0564965	0.00987483	6
	0.028464	0.0591587	0.0874998			1	80.5728	17.9539	0.0455208	0.0101433	6
1	0.0327604	0.026531	0.0809396			2	92.9308	13.2079	0.0525026	0.00746202	6
	0.022458	0.038061	0.0723747			3	139.977	20.2753	0.0790819	0.0114548	6
2	0.0519872	0.0517147	0.0721893			6	192.746	22.0926	0.108895	0.0124816	5
	0.0314452	0.0334067	0.0742727			12	221.615	14.81	0.125205	0.00836715	6
3	0.0570181	0.0924291	0.107522
	0.0388609	0.0715153	0.107146
6	0.0800725	0.0961241	0.147257
	0.092551	0.12847
12	0.127672	0.147425	0.109713
	0.133866	0.140004	0.0925488

## Sheet: Fig.3b SystemXc
G3PDH		mRNA copy numbers (copies/mg totalRNA)
		cDNA sample
Treatment		091620RT #1-10	091620RT #11-20	091720RT #1-10	091720RT #11-20
None		7.81668e+10	8.65521e+10	8.79369e+10	6.55422e+10
		9.2449e+10	9.95711e+10	8.55702e+10	8.18093e+10
1µM TPNA10168		8.79084e+10	8.88486e+10	9.36654e+10	9.30698e+10
		1.08106e+11	9.85189e+10	7.80183e+10	8.4031e+10
3µM TPNA10168		9.91367e+10	1.10438e+11	8.73931e+10	8.25368e+10
		1.01112e+11	9.99606e+10	8.03086e+10	7.56159e+10
10µM TPNA10168		8.69092e+10	1.08225e+11	8.37793e+10	1.13728e+11
		5.64148e+10	1.03519e+11	8.46947e+10	9.09083e+10
30µM TPNA10168		1.0243e+11	1.10221e+11	7.49612e+10	8.61729e+10
		2.57404e+10	9.34309e+10	8.54945e+10	1.03025e+11
System Xc		mRNA copy numbers (copies/mg totalRNA)
		cDNA sample
Treatment		091620RT #1-10	091620RT #11-20	091720RT #1-10	091720RT #11-20
None		1.08351e+10	1.12758e+10	4.81539e+09	6.43134e+09
		2.08574e+10	2.10211e+10	8.84152e+09	8.86989e+09
1µM TPNA10168		2.54009e+10	1.39761e+10	1.45577e+10	1.48111e+10
		2.69873e+10	3.68022e+10	1.21219e+10	8.43319e+09
3µM TPNA10168		5.33383e+10	4.37118e+10	2.15708e+10	1.61429e+10
		2.70331e+10	3.61593e+10	1.58289e+10	1.51209e+10
10µM TPNA10168		6.93935e+10	7.74499e+10	2.28239e+10	2.65439e+10
		2.77694e+10	7.47872e+10	2.33064e+10	2.34556e+10
30µM TPNA10168		1.06439e+11	7.91134e+10	2.47903e+10	2.67943e+10
		1.03658e+10	5.99233e+10	2.88451e+10	2.09806e+10
System Xc/G3PDH		Relative expression to G3PDH (System Xc/G3PDH)
		cDNA sample					TPNA 10168	Relative expression to G3PDH (SystemXc/G3PDH)				n
Treatment		091620RT #1-10	091620RT #11-20	091720RT #1-10	091720RT #11-20			mean (% of None)	SEM (% of None)	meam	SEM
None		0.138615	0.130277	0.0547596	0.0981251		None	100	15.324	0.133781	0.0205006	8
		0.22561	0.211116	0.103325	0.108422
1µM TPNA10168		0.288948	0.157302	0.155422	0.159139		1µM	153.21	23.9937	0.204967	0.032099	8
		0.249638	0.373555	0.155373	0.100358
3µM TPNA10168		0.538028	0.395803	0.246825	0.195584		3µM	224.471	32.3728	0.3003	0.0433087	8
		0.267357	0.361735	0.197101	0.199969
10µM TPNA10168		0.798459	0.71564	0.272428	0.233397		10µM	352.049	63.9863	0.470975	0.0856017	8
		0.492237	0.722446	0.275181	0.258013
30µM TPNA10168		1.03914	0.71777	0.330708	0.310936		30µM	387.426	74.6461	0.518304	0.0998625	8
		0.402706	0.641364	0.337391	0.203646

## Sheet: Fig.3b GCLm
G3PDH		mRNA copy numbers (copies/mg totalRNA)
		cDNA sample
Treatment		091620RT #1-10	091620RT #11-20	091720RT #1-10	091720RT #11-20
None		7.81668e+10	8.65521e+10	8.79369e+10	6.55422e+10
		9.2449e+10	9.95711e+10	8.55702e+10	8.18093e+10
1µM TPNA10168		8.79084e+10	8.88486e+10	9.36654e+10	9.30698e+10
		1.08106e+11	9.85189e+10	7.80183e+10	8.4031e+10
3µM TPNA10168		9.91367e+10	1.10438e+11	8.73931e+10	8.25368e+10
		1.01112e+11	9.99606e+10	8.03086e+10	7.56159e+10
10µM TPNA10168		8.69092e+10	1.08225e+11	8.37793e+10	1.13728e+11
		5.64148e+10	1.03519e+11	8.46947e+10	9.09083e+10
30µM TPNA10168		1.0243e+11	1.10221e+11	7.49612e+10	8.61729e+10
		2.57404e+10	9.34309e+10	8.54945e+10	1.03025e+11
GCLm		mRNA copy numbers (copies/mg totalRNA)
		cDNA sample
Treatment		091620RT #1-10	091620RT #11-20	091720RT #1-10	091720RT #11-20
None		5.87377e+10	9.1398e+10	4.51098e+10	5.73151e+10
		1.02082e+11	1.02798e+11	9.6904e+10	6.12238e+10
1µM TPNA10168		1.21629e+11	9.04187e+10	1.39481e+11	1.20984e+11
		1.45112e+11	1.45818e+11	1.08984e+11	7.78206e+10
3µM TPNA10168		1.64322e+11	1.83112e+11	1.38859e+11	1.32032e+11
		1.43369e+11	1.58587e+11	1.43277e+11	1.27295e+11
10µM TPNA10168		1.52243e+11	1.93711e+11	1.52854e+11	2.28974e+11
		1.39163e+11	1.76457e+11	1.2673e+11	1.4813e+11
30µM TPNA10168		2.40809e+11	2.46436e+11	1.8053e+11	2.03432e+11
		4.14127e+10	2.07635e+11	1.92996e+11	1.68298e+11
GCLm/G3PDH		Relative expression to G3PDH (GCLm/G3PDH)
		cDNA sample					TPNA 10168	Relative expression to G3PDH (GCLm/G3PDH)				n
Treatment		091620RT #1-10	091620RT #11-20	091720RT #1-10	091720RT #11-20			mean (% of None)	SEM (% of None)	meam	SEM
None		0.751441	1.05599	0.512979	0.874476		None	100	8.55445	0.90154	0.0771218	8
		1.1042	1.03241	1.13245	0.748372
1µM TPNA10168		1.38358	1.01767	1.48914	1.29993		1µM	143.307	8.19104	1.29197	0.0738455	8
		1.34231	1.48011	1.3969	0.926094
3µM TPNA10168		1.65753	1.65804	1.5889	1.59967		3µM	179.915	4.11598	1.62201	0.0371072	8
		1.41792	1.5865	1.78408	1.68344
10µM TPNA10168		1.75174	1.7899	1.82449	2.01334		10µM	203.493	11.6146	1.83457	0.104711	8
		2.46678	1.70458	1.49632	1.62944
30µM TPNA10168		2.35096	2.23583	2.40831	2.36074		30µM	230.896	15.6762	2.08162	0.141328	8
		1.60886	2.22234	2.25741	1.63356

## Sheet: Fig.3b GCLc
G3PDH		mRNA copy numbers (copies/mg totalRNA)
		cDNA sample
Treatment		051921RT #1-10	051921RT #11-20	051921RT #21-25
None		5.96801e+10	5.55216e+10	7.95676e+10
		6.86451e+10	9.04992e+10
1µM TPNA10168		6.88329e+10	8.17586e+10
		5.98806e+10	5.07987e+10
3µM TPNA10168		5.82622e+10	7.08051e+10	5.64613e+10
		6.32092e+10	6.11e+10
10µM TPNA10168		4.89228e+10	7.49349e+10	2.44751e+10
		8.52763e+10	1.33503e+11
30µM TPNA10168		7.1751e+10	7.43692e+10	1.04783e+11
		8.26524e+10	1.11192e+11
GCLc		mRNA copy numbers (copies/mg totalRNA)
		cDNA sample
Treatment		051921RT #1-10	051921RT #11-20	051921RT #21-25
None		8.66349e+09	1.09905e+10	1.00376e+10
		9.16478e+09	8.96804e+09
1µM TPNA10168		1.5563e+10	1.78746e+10
		1.45615e+10	1.0659e+10
3µM TPNA10168		1.28965e+10	1.42197e+10	8.19369e+09
		1.29997e+10	1.292e+10
10µM TPNA10168		1.48617e+10	1.99515e+10	6.04874e+09
		2.10068e+10	3.5424e+10
30µM TPNA10168		1.94717e+10	2.15205e+10	2.64894e+10
		2.38396e+10	3.56609e+10
GCLc/G3PDH		Relative expression to G3PDH (GCLc/G3PDH)
		cDNA sample					TPNA 10168	Relative expression to G3PDH (GCLc/G3PDH)				n
Treatment		051921RT #1-10	051921RT #11-20	051921RT #21-25				mean (% of None)	SEM (% of None)	meam	SEM
None		0.145165	0.19795	0.126152			None	100	11.5872	0.140375	0.0162655	5
		0.13351	0.0990952
1µM TPNA10168		0.226099	0.218626				1µM	159.881	5.04178	0.224432	0.00707738	4
		0.243175	0.209828
3µM TPNA10168		0.221353	0.200829	0.14512			3µM	140.256	9.53524	0.196884	0.013385	5
		0.205662	0.211457
10µM TPNA10168		0.30378	0.266252	0.247138			10µM	189.329	7.42019	0.26577	0.0104161	5
		0.246339	0.265342
30µM TPNA10168		0.271379	0.289374	0.252802			30µM	188.814	5.35925	0.265047	0.00752303	5
		0.288432	0.320716

## Sheet: Fig.3c system Xc
G3PDH		mRNA copy numbers (copies/mg totalRNA)
		cDNA sample
Nrf-2 inhibitor	TPNA10168 ( mM)	080521RT
		#01-04	#05-08	#09-12	#13-16
none	0	4.24643e+11	5.42307e+11	4.41062e+11	4.50018e+11
	10	7.57423e+11	7.43523e+11	8.48387e+11	6.81967e+11
ML385	0	5.36831e+11	7.17442e+11	5.26378e+11	5.18799e+11
	10	7.49525e+11	8.02923e+11	5.81211e+11	7.74351e+11
System Xc		mRNA copy numbers (copies/mg totalRNA)
		cDNA sample
Nrf-2 inhibitor	TPNA10168 ( mM)	080521RT
		#01-04	#05-08	#09-12	#13-16
none	0	1.03147e+10	2.24083e+10	1.9195e+10	2.18918e+10
	10	5.31713e+11	4.96887e+11	7.52902e+11	6.18304e+11
ML385	0	3.86753e+10	4.82065e+10	4.13062e+10	2.61948e+10
	10	2.92835e+11	2.48744e+11	2.50045e+11	2.44331e+11
Sysrem Xc/G3PDH		Relative expression to G3PDH (System X/G3PDH)
		cDNA sample
Nrf-2 inhibitor	TPNA10168 ( mM)	080521RT					Nrf-2 inhibitor	TPNA10168 (mM)	Relative expression to G3PDH (System X/G3PDH)				n
		#01-04	#05-08	#09-12	#13-16				mean (% of None)	SEM (% of None)	meam	SEM
none	0	0.0242903	0.0413202	0.04352	0.0486466		none	0	100	13.3843	0.0394443	0.00527934	4
	10	0.702003	0.668287	0.887452	0.906649			10	2005.61	156.378	0.791098	0.0616823	4
ML385	0	0.0720437	0.0671921	0.0784726	0.0504913		ML385	0	169.987	15.1694	0.0670499	0.00598347	4
	10	0.390694	0.309798	0.430213	0.31553			10	916.633	74.4916	0.361559	0.0293827	4

## Sheet: Fig.3c GCL-m
G3PDH		mRNA copy numbers (copies/mg totalRNA)
		cDNA sample
Nrf-2 inhibitor	TPNA10168 ( mM)	080521RT
		#01-04	#05-08	#09-12	#13-16
none	0	4.24643e+11	5.42307e+11	4.41062e+11	4.50018e+11
	10	7.57423e+11	7.43523e+11	8.48387e+11	6.81967e+11
ML385	0	5.36831e+11	7.17442e+11	5.26378e+11	5.18799e+11
	10	7.49525e+11	8.02923e+11	5.81211e+11	7.74351e+11
GCLm		mRNA copy numbers (copies/mg totalRNA)
		cDNA sample
Nrf-2 inhibitor	TPNA10168 ( mM)	080521RT
		#01-04	#05-08	#09-12	#13-16
none	0	3.88967e+10	6.7506e+10	5.5623e+10	5.81914e+10
	10	4.86809e+11	6.42443e+11	6.57835e+11	4.02888e+11
ML385	0	6.99258e+10	8.99361e+10	5.76944e+10	7.67841e+10
	10	1.99069e+11	1.84978e+11	1.47481e+11	2.28966e+11
GCLm/G3PDH		Relative expression to G3PDH (GCLm/G3PDH)
		cDNA sample
Nrf-2 inhibitor	TPNA10168 ( mM)	080521RT					Nrf-2 inhibitor	TPNA10168 (mM)	Relative expression to G3PDH (GCLm/G3PDH)				n
		#01-04	#05-08	#09-12	#13-16				mean (% of None)	SEM (% of None)	meam	SEM
none	0	0.0915986	0.124479	0.126111	0.129309		none	0	100	7.47905	0.117875	0.0088159	4
	10	0.642717	0.864053	0.775396	0.590774			10	609.321	52.7983	0.718235	0.0622357	4
ML385	0	0.130257	0.125357	0.109606	0.148004		ML385	0	108.849	6.70765	0.128306	0.00790662	4
	10	0.265593	0.230381	0.253747	0.295688			10	221.721	11.5232	0.261352	0.013583	4

## Sheet: Fig.3c GCL-c
G3PDH		mRNA copy numbers (copies/mg totalRNA)
		cDNA sample
Nrf-2 inhibitor	TPNA10168 ( mM)	080521RT
		#01-04	#05-08	#09-12	#13-16
none	0	4.24643e+11	5.42307e+11	4.41062e+11	4.50018e+11
	10	7.57423e+11	7.43523e+11	8.48387e+11	6.81967e+11
ML385	0	5.36831e+11	7.17442e+11	5.26378e+11	5.18799e+11
	10	7.49525e+11	8.02923e+11	5.81211e+11	7.74351e+11
GCLc		mRNA copy numbers (copies/mg totalRNA)
		cDNA sample
Nrf-2 inhibitor	TPNA10168 ( mM)	080521RT
		#01-04	#05-08	#09-12	#13-16
none	0	2.15416e+09	3.00031e+09	2.16646e+09	2.50327e+09
	10	5.70234e+09	5.16004e+09	6.28604e+09	5.98331e+09
ML385	0	2.4491e+09	1.42571e+09	1.60789e+09	1.03913e+08
	10	1.69383e+09	2.6849e+09	2.18536e+09	3.27512e+09
GCLc/G3PDH		Relative expression to G3PDH (GCLc/G3PDH)
		cDNA sample
Nrf-2 inhibitor	TPNA10168 ( mM)	080521RT					Nrf-2 inhibitor	TPNA10168 (mM)	Relative expression to G3PDH (GCLc/G3PDH)				n
		#01-04	#05-08	#09-12	#13-16				mean (% of None)	SEM (% of None)	meam	SEM
none	0	0.00507286	0.0055325	0.00491193	0.0055626		none	0	100	3.10641	0.00526997	0.000163707	4
	10	0.00752861	0.00693999	0.0074094	0.00877361			10	145.407	7.4275	0.0076629	0.000391427	4
ML385	0	0.00456215	0.00198721	0.00305464	0.000200296		ML385	0	46.5102	17.4103	0.00245107	0.000917519	4
	10	0.00225987	0.0033439	0.00376	0.0042295			10	64.4846	7.97703	0.00339832	0.000420387	4
