# Supplementary material for: TPNA10168, an Nrf-2 activator, stimulates glutathione production by inducing system Xc-, and g-glutamate cysteine ligase subunits in cultured mouse astrocytes.
Source: Research Square preprint supplement (doi:10.21203/rs.3.rs-1567238/v1), 2022-04-20
Supplement: Supplementary file 2 [file 44f093f405fb8c1ca25588ad.xlsx]

## Sheet: Fig.5a
	Sample#	TPNA10168 treatment (hour)	Total glutathione (mg/well)	Total protein (mg/well)	gluthathione content (mg/mg protein)
	1	0	0.0718121	0.0162748	4.41247
	2	12	0.0904646	0.0279081	3.24152
	3	24	0.221498	0.0336379	6.58479
	4	48	0.249011	0.0261718	9.51448
	5	0	0.0858015	0.0372842	2.30129
	6	12	0.143158	0.0178375	8.02568
	7	24	0.196318	0.0249564	7.86644
	8	48	0.138029	0.0141912	9.72633
	9	0	0.14549	0.0391941	3.71202
	10	12	0.275124	0.0259981	10.5825
	11	24	0.354864	0.0230464	15.3978
	12	48	0.251342	0.026519	9.47781
	13	0	0.107718	0.0107186	10.0497
	14	12	0.172069	0.0173166	9.93668
	15	24	0.412687	0.0348533	11.8407
	16	48	0.224763	0.0279081	8.05367
	17	0	0.213105	0.0404095	5.27363
	18	12	0.347403	0.0358951	9.67827
	19	24	0.270928	0.0310335	8.73018
	20	48	0.206576	0.0305126	6.77021
	21	0	0.224296	0.0461394	4.86128
	22	12	0.260202	0.0324225	8.02537
	23	24	0.257405	0.0437085	5.88911
	24	48	0.284917	0.028429	10.0221
		TPNA10168 treatment
		0 h	12 h	24 h	48 h
	Total glutathone (mg/mg protein)	4.41247	3.24152	6.58479	9.51448
		2.30129	8.02568	7.86644	9.72633
		3.71202	10.5825	15.3978	9.47781
		10.0497	9.93668	11.8407	8.05367
		5.27363	9.67827	8.73018	6.77021
		4.86128	8.02537	5.88911	10.0221
	mean	5.10172	8.24833	9.38483	8.92743
	SEM	1.07731	1.08798	1.47175	0.513194
	N	6	6	6	6

## Sheet: Fig.5b
		Cell Numbers
	Experiment #	control						2.5nM rotenone
		none			TPNA10168			none			TPNA10168
		Et-D (+)	Total	Dead (%)	Et-D (+)	Total	Dead (%)	Et-D (+)	Total	Dead (%)	Et-D (+)	Total	Dead (%)
	#1	16	541	2.95749	13	454	2.86344	392	680	57.6471	112	406	27.5862
	#2	13	447	2.90828	17	480	3.54167	436	608	71.7105	116	367	31.6076
	#3	6	423	1.41844	28	432	6.48148	278	448	62.0536	90	404	22.2772
	#4	9	415	2.16867	50	495	10.101	285	470	60.6383	98	515	19.0291
	MEAN			2.36322			5.7469			63.0124			25.125				=
	SEM			0.362939			1.65013			3.04138			2.78914
	N			4			4			4			4
										Treatment
										control/ none	control/ TPNA10168	rotenone/ none	rotenone/ TPNA10168
									MEAN	2.36322	5.7469	63.0124	25.125
									SEM	0.362939	1.65013	3.04138	2.78914
									N	4	4	4	4

## Sheet: Fig.5c
	Treatment		Sample#	Total glutathione (mg/well)	Total protein (mg/well)	gluthathione content (mg/mg protein)
	control	none	072621 #1	0.0368085	0.0386482	0.952397
		TPNA	072621 #2	0.173632	0.0647619	2.68109
	rotenone	none	072621 #3	0.00506538	0.0283564	0.178633
		TPNA	072621 #4	0.0244217	0.0467896	0.521948
	control	none	072621 #5	0.0287038	0.0529339	0.542258
		TPNA	072621 #6	0.0661173	0.0532412	1.24185
	rotenone	none	072621 #7	0.00776692	0.0894931	0.086788
		TPNA	072621 #8	0.0741586	0.057235	1.29569
	control	none	072621 #9	0.0445754	0.0621505	0.717216
		TPNA	072621 #10	0.180297	0.0616897	2.92265
	rotenone	none	072621 #11	0.00776692	0.0831951	0.093358
		TPNA	072621 #12	0.0476521	0.0692166	0.68845
	control	none	072821 #1	0.0256646	0.0707527	0.362737
		TPNA	072821 #2	0.168338	0.0744393	2.26141
	rotenone	none	072821 #3	0.0162092	0.0647619	0.25029
		TPNA	072821 #4	0.081512	0.066298	1.22948
	control	none	072821 #5	0.0449131	0.0636866	0.70522
		TPNA	072821 #6	0.18078	0.0652227	2.77174
	rotenone	none	072821 #7	0.00979308	0.0715207	0.136926
		TPNA	072821 #8	0.0408021	0.075361	0.541423
	control	none	072821 #9	0.0209369	0.0682949	0.306566
		TPNA	072821 #10	0.0819021	0.0704455	1.16263
	rotenone	none	072821 #11	0.0239762	0.0767435	0.312419
		TPNA	072821 #12	0.0827956	0.0553917	1.49473
			Treatment
			control/ none	control/ TPNA10168	rotenone/ none	rotenone/ TPNA10168
		Total glutathone (mg/mg protein)	0.952397	2.68109	0.178633	0.521948
			0.542258	1.24185	0.086788	1.29569
			0.717216	2.92265	0.093358	0.68845
			0.362737	2.26141	0.25029	1.22948
			0.70522	2.77174	0.136926	0.541423
			0.306566	1.16263	0.312419	1.49473
		mean	0.597732	2.17356	0.176402	0.961953
		SEM	0.0991119	0.320121	0.0367198	0.174361
		N	6	6	6	6
															0.5
